# Supplementary material
Source: publisher figshare collection journal article supplement (https://tandf.figshare.com/articles/dataset/_/25359360)
Supplement: Supplementary file 1 [file 1]

## Supplementary file

| Comp.<br>code/name | Chemical<br>structure                                                               | IC <sub>50</sub> (μM)<br>(AGS) | IC <sub>50</sub> (μM)<br>(MCF-7) | MW     | ClogP | HBD | HBA |
|--------------------|-------------------------------------------------------------------------------------|--------------------------------|----------------------------------|--------|-------|-----|-----|
| 1                  | 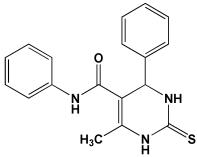   | 98.48 ± 10.62                  | 149.13 ± 9.01                    | 323.41 | 2.54  | 3   | 1   |
| 2                  |    | 41.10 ± 5.01                   | 75.69 ± 7.87                     | 380.49 | 3.05  | 3   | 2   |
| 3                  |    | 9.9 ± 0.3                      | 15.2 ± 0.4                       | 341.40 | 2.85  | 3   | 2   |
| 4                  |    | 26.5 ± 1.1                     | 44.4 ± 1.2                       | 402.31 | 3.15  | 3   | 1   |
| 5                  |  | 23.8 ± 1.1                     | 25.9 ± 7.2                       | 415.51 | 3.73  | 3   | 2   |
| <b>Monastrol</b>   |  | 106.0 ± 0.1                    | 133.0 ± 0.9                      | 292.35 | 1.65  | 3   | 3   |
