# Supplementary material
Source: publisher figshare collection journal article supplement (https://tandf.figshare.com/articles/dataset/_/25359360)
Supplement: Supplementary file 2 [file 1]

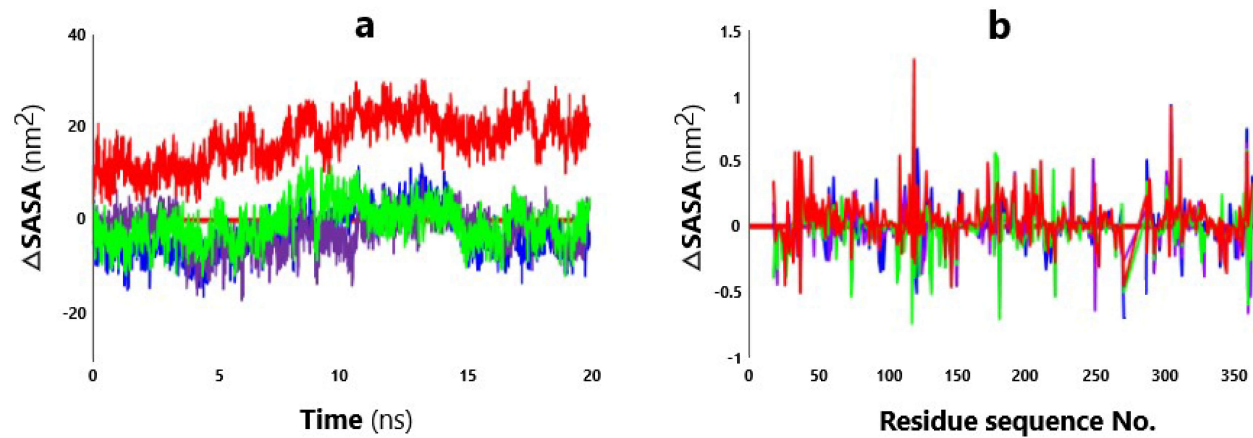

Difference of SASA ( $\Delta\text{SASA}$ ) between holo and apo D130V-Eg5 structures and **b**) per residue difference of SASA ( $\Delta\text{SASA}$ ) between holo and apo D130V-Eg5 structures; (*R*)-2/D130V-Eg5 (Blue), (*R*)-4/D130V-Eg5 (violet), (*R*)-5/D130V-Eg5 (green) and monastrol/D130V (red)
